# Supplementary material
Source: publisher figshare collection journal article supplement (https://acs.figshare.com/ndownloader/files/10127739)
Supplement: Supplementary file 1 [file 10127739]

Compound_ID	SMILES
5	O[C@@H]1[C@H](O)[C@@H](CCl)O[C@H]1N2C=NC3=C2N=CN=C3NC4COCC4
6	O[C@@H]1[C@H](O)[C@@H](CCl)O[C@H]1N2C=NC3=C2N=C(Cl)N=C3NC4COCC4
7	O[C@@H]1[C@H](O)[C@@H](CCl)O[C@H]1N2C=NC3=C2N=CN=C3NC4=CC=C(Cl)C=C4F
8	O[C@@H]1[C@H](O)[C@@H](CCl)O[C@H]1N2C=NC3=C2N=C(Cl)N=C3NC4=CC=C(Cl)C=C4F
9	O[C@@H]1[C@H](O)[C@@H](CN2N=C(C)C=C2C)O[C@H]1N3C=NC4=C3N=CN=C4NC5CCCC5
10	ClC1=NC2=C(C(NC3CCCC3)=N1)N=CN2[C@@H]4O[C@H](CN5N=C(C)C=C5C)[C@@H](O)[C@H]4O
11	O[C@@H]1[C@H](O)[C@@H](CN2N=C(C)C=C2C)O[C@H]1N3C=NC4=C3N=CN=C4NC5[C@H]6CC[C@H](C6)C5
12	ClC1=NC2=C(C(NC3[C@H]4CC[C@H](C4)C3)=N1)N=CN2[C@@H]5O[C@H](CN6N=C(C)C=C6C)[C@@H](O)[C@H]5O
13	O[C@@H]1[C@H](O)[C@@H](CN2N=C(C)C=C2C)O[C@H]1N3C=NC4=C3N=CN=C4NC5COCC5
14	O[C@@H]1[C@H](O)[C@@H](CN2N=C(C)C=C2C)O[C@H]1N3C=NC4=C3N=C(Cl)N=C4NC5COCC5
15	O[C@@H]1[C@H](O)[C@@H](CN2N=C(C)C=C2C)O[C@H]1N3C=NC4=C3N=CN=C4NC5=CC=C(Cl)C=C5F
16	O[C@@H]1[C@H](O)[C@@H](CN2N=C(C)C=C2C)O[C@H]1N3C=NC4=C3N=C(Cl)N=C4NC5=CC=C(Cl)C=C5F
17	O[C@@H]1[C@H](O)[C@@H](CN2N=C(C)C=C2C)O[C@H]1N3C=NC4=C3N=C(N5N=C(C)C=C5C)N=C4NC6CCCC6
18	O[C@@H]1[C@H](O)[C@@H](CN2N=C(C)C=C2C)O[C@H]1N3C=NC4=C3N=C(N5N=C(C)C=C5C)N=C4NC6[C@H]7CC[C@H](C7)C6
19	O[C@@H]1[C@H](O)[C@@H](CN2N=C(C)C=C2C)O[C@H]1N3C=NC4=C3N=C(N5N=C(C)C=C5C)N=C4NC6COCC6
20	O[C@@H]1[C@H](O)[C@@H](CN2N=C(C)C=C2C)O[C@H]1N3C=NC4=C3N=C(N5N=C(C)C=C5C)N=C4NC6=CC=C(Cl)C=C6F
